# Supplementary material for: Specific delivery of microRNA93 into HBV-replicating hepatocytes downregulates protein expression of liver cancer susceptible gene MICA
Source: PubMed Central journal article supplement (PMC4170619; doi:10.18632/oncotarget.2143), 2014-06-26
Supplement: oncotarget-05-5581-s001.pdf [file oncotarget-05-5581-s001.pdf]

## Specific delivery of microRNA93 into HBV-replicating hepatocytes downregulates protein expression of liver cancer susceptible gene MICA

### Supplementary Material

#### Supplementary Table 1: Genes upregulated by HBV infection in primary hepatocytes.

Genes upregulated more than four-fold are indicated. The colored numbers indicate those genes with significant levels of expression (more than 10 in signal intensities and higher expression in darker color) and more reliable expression changes.

| Gene Symbol | Gene description                                                               | Control | HBV   | Ratio |
|-------------|--------------------------------------------------------------------------------|---------|-------|-------|
| CPSF6       | Cleavage and polyadenylation specificity factor subunit 6                      | 2       | 48    | 21.91 |
| TDO2        | Tryptophan 2,3-dioxygenase                                                     | 82      | 1535  | 18.76 |
| CYP2B7P1    | CYP2B7P1 protein                                                               | 2       | 33    | 17.02 |
| HSD17B13    | 17-beta hydroxysteroid dehydrogenase 13 Precursor                              | 9       | 125   | 13.19 |
| HIST1H4I    | Histone H4                                                                     | 2       | 23    | 12.82 |
| APOA4       | apolipoprotein A-IV precursor                                                  | 952     | 12040 | 12.65 |
| SLPI        | Antileukoproteinase Precursor                                                  | 99      | 1104  | 11.16 |
| SHBG        | Sex hormone-binding globulin Precursor                                         | 19      | 199   | 10.34 |
| SAA1        | Serum amyloid A protein Precursor                                              | 59      | 609   | 10.31 |
| ZDHHC15     | Palmitoyltransferase ZDHHC15                                                   | 1       | 13    | 10.11 |
| SLC3A1      | Neutral and basic amino acid transport protein rBAT                            | 7       | 66    | 9.76  |
| KRT19       | Keratin, type I cytoskeletal 19 (Cytokeratin-19)                               | 4       | 37    | 9.01  |
| HSD11B1     | Corticosteroid 11-beta-dehydrogenase isozyme 1                                 | 11      | 100   | 9.01  |
| CYP2A7      | Cytochrome P450 2A7                                                            | 280     | 2510  | 8.97  |
| ANKRD33     | Ankyrin repeat domain-containing protein 33                                    | 3       | 24    | 8.82  |
| CIDEA       | Cell death activator CIDE-3                                                    | 5       | 40    | 8.27  |
| MXRA7       | Matrix-remodeling-associated protein 7 (Transmembrane anchor protein 1)        | 8       | 65    | 8.25  |
| CYP2C8      | Cytochrome P450 2C8                                                            | 518     | 4010  | 7.74  |
| HMGCS2      | Hydroxymethylglutaryl-CoA synthase, mitochondrial Precursor (HMG-CoA synthase) | 746     | 5615  | 7.52  |
| SAA2        | serum amyloid A2 isoform a                                                     | 48      | 353   | 7.37  |
| CYP2A6      | Cytochrome P450 2A6                                                            | 434     | 3127  | 7.21  |
| TMEM63B     | Transmembrane protein 63B                                                      | 4       | 31    | 7.01  |

|            |                                                                |      |       |      |
|------------|----------------------------------------------------------------|------|-------|------|
| G0S2       | Putative lymphocyte G0/G1 switch protein 2                     | 68   | 475   | 6.98 |
| STRADA     | STE20-related adapter protein                                  | 112  | 753   | 6.72 |
| CYP3A4     | Cytochrome P450 3A4                                            | 296  | 1958  | 6.62 |
| MAFF       | Transcription factor MafF                                      | 37   | 243   | 6.57 |
| APOA5      | Apolipoprotein A-V Precursor                                   | 23   | 150   | 6.46 |
| DHRS12     | dehydrogenase/reductase                                        | 4    | 26    | 6.41 |
| C10orf125  | Protein fucU homolog                                           | 47   | 296   | 6.35 |
| FGF21      | Fibroblast growth factor 21 Precursor                          | 27   | 172   | 6.31 |
| CYP3A43    | Cytochrome P450 3A43                                           | 3    | 20    | 5.90 |
| NR1I3      | Nuclear receptor subfamily 1 group I member 3                  | 27   | 157   | 5.83 |
| CCDC40     | Coiled-coil domain-containing protein 40                       | 2    | 10    | 5.70 |
| INHBE      | Inhibin beta E chain Precursor (Activin beta-E chain)          | 10   | 57    | 5.58 |
| AGXT       | Serine--pyruvate aminotransferase (SPT)                        | 277  | 1539  | 5.55 |
| L3MBTL     | Lethal(3)malignant brain tumor-like protein                    | 52   | 289   | 5.54 |
| B3GNT3     | UDP-GlcNAc:betaGal beta-1,3-N-acetylglucosaminyltransferase 3  | 6    | 31    | 5.45 |
| RDH16      | Retinol dehydrogenase 16                                       | 8    | 43    | 5.21 |
| GPAM       | Glycerol-3-phosphate acyltransferase 1                         | 11   | 58    | 5.13 |
| CYP3A4     | Cytochrome P450 3A4                                            | 5204 | 26140 | 5.02 |
| CYP4A11    | Cytochrome P450 4A11 Precursor                                 | 59   | 290   | 4.91 |
| AC011472.7 | Hepatocellular carcinoma-associated protein TD26 Precursor     | 28   | 132   | 4.79 |
| TXNIP      | Thioredoxin-interacting protein                                | 17   | 81    | 4.77 |
| GPD1       | Glycerol-3-phosphate dehydrogenase [NAD+], cytoplasmic         | 15   | 69    | 4.70 |
| ADFP       | Adipophilin (Adipose differentiation-related protein)          | 1966 | 9241  | 4.70 |
| CREB3L3    | Cyclic AMP-responsive element-binding protein 3-like protein 3 | 43   | 198   | 4.64 |
| NOS3       | Nitric oxide synthase, endothelia                              | 9    | 41    | 4.64 |
| PGLYRP2    | N-acetylmuramoyl-L-alanine amidase Precursor                   | 5    | 20    | 4.43 |
| DOHH       | Deoxyhypusine hydroxylase                                      | 230  | 1006  | 4.38 |
| NR1I3      | Nuclear receptor subfamily 1 group I member 3                  | 43   | 185   | 4.34 |
| S100P      | Protein S100-P                                                 | 10   | 43    | 4.34 |
| CYP2D6     | Cytochrome P450 2D6                                            | 74   | 310   | 4.21 |
| ZG16       | Zymogen granule membrane protein 16 Precursor                  | 18   | 73    | 4.12 |
| PRSS2      | Trypsin-2 Precursor                                            | 41   | 168   | 4.08 |
| ALDOB      | Fructose-bisphosphate aldolase B                               | 3659 | 14634 | 4.00 |

**Supplementary Table 2: Genes downregulated by HBV infection in primary hepatocytes.** Genes whose expression was downregulated by less than 25% are indicated. The colors used are defined in Supplementary Table 1.

| Gene Symbol | Gene description                                                      | Control | HBV | Ratio |
|-------------|-----------------------------------------------------------------------|---------|-----|-------|
| NPPB        | Natriuretic peptides B Precursor                                      | 273     | 16  | 0.06  |
| NCF2        | Neutrophil cytosol factor 2                                           | 67      | 5   | 0.07  |
| ACP1        | Low molecular weight phosphotyrosine protein phosphatase (LMW-PTPase) | 1021    | 85  | 0.08  |
| MAP2        | Microtubule-associated protein 2                                      | 10      | 1   | 0.12  |
| TUBB3       | Tubulin beta-3 chain                                                  | 34      | 5   | 0.14  |
| LOXL2       | Lysyl oxidase homolog 2 Precursor                                     | 12      | 2   | 0.14  |
| EDN1        | Endothelin-1 Precursor                                                | 46      | 7   | 0.14  |
| DCDC2       | Doublecortin domain-containing protein 2                              | 10      | 2   | 0.16  |
| C5orf46     | Uncharacterized protein C5orf46 Precursor                             | 11      | 2   | 0.17  |
| CXCL6       | C-X-C motif chemokine 6 Precursor (Small-inducible cytokine B6)       | 31      | 5   | 0.17  |
| TMEM27      | Collectrin Precursor (Transmembrane protein 27)                       | 140     | 25  | 0.18  |
| TUBA1A      | Tubulin alpha-1A chain                                                | 342     | 63  | 0.18  |
| CCL2        | C-C motif chemokine 2 Precursor (Small-inducible cytokine A2)         | 73      | 14  | 0.19  |
| FILIP1L     | Filamin A-interacting protein 1-like                                  | 78      | 16  | 0.20  |
| XRCC4       | DNA repair protein XRCC4                                              | 50      | 10  | 0.20  |
| TAGLN       | Transgelin (Smooth muscle protein 22-alpha)(SM22-alpha)               | 360     | 76  | 0.21  |
| TNFRSF19    | Tumor necrosis factor receptor superfamily member 19 Precursor        | 12      | 3   | 0.22  |
| TPM2        | Tropomyosin beta chain (Tropomyosin-2)(Beta-tropomyosin)              | 31      | 7   | 0.23  |
| FGL1        | Fibrinogen-like protein 1 Precursor                                   | 3452    | 835 | 0.24  |
| DACT1       | Dapper homolog 1                                                      | 11      | 3   | 0.24  |
| MYL9        | Myosin regulatory light polypeptide 9                                 | 74      | 18  | 0.25  |

**Supplementary Table 3: miRNAs upregulated by HBV infection in primary hepatocytes.** The miRNAs whose expression was upregulated by more than two-fold are indicated. The orange-colored numbers indicate those genes with significant levels of expression (more than 100 in signal intensities).

| microRNA         | Control | HBV   | Ratio |
|------------------|---------|-------|-------|
| hsa-miR-4472     | 7.0     | 44.4  | 6.31  |
| hsa-miR-4481     | 40.2    | 208.3 | 5.18  |
| hsa-miR-660-5p   | 8.4     | 32.2  | 3.83  |
| hsa-miR-124-3p   | 9.7     | 35.9  | 3.69  |
| hsa-miR-4445-5p  | 9.2     | 33.5  | 3.63  |
| hsa-miR-362-5p   | 11.4    | 41.2  | 3.60  |
| hsa-miR-203a     | 7.9     | 25.9  | 3.27  |
| hsa-miR-5698     | 13.5    | 43.0  | 3.19  |
| hsa-miR-6127     | 11.1    | 35.0  | 3.16  |
| hsa-miR-215      | 188.1   | 575.7 | 3.06  |
| hsa-miR-4483     | 10.2    | 28.6  | 2.81  |
| hsa-miR-335-5p   | 8.0     | 22.3  | 2.80  |
| hsa-miR-3190-5p  | 6.9     | 18.7  | 2.69  |
| hsa-miR-4676-5p  | 6.4     | 16.4  | 2.55  |
| hsa-miR-935      | 7.2     | 18.2  | 2.53  |
| hsa-miR-520a-3p  | 6.9     | 16.7  | 2.43  |
| hsa-miR-3605-5p  | 7.2     | 17.2  | 2.41  |
| hsa-miR-1273g-5p | 9.6     | 22.3  | 2.31  |
| hsa-miR-4456     | 9.0     | 20.2  | 2.25  |
| hsa-miR-200a-3p  | 10.5    | 23.3  | 2.23  |
| hsa-miR-212-3p   | 20.4    | 45.1  | 2.22  |
| hsa-miR-3654     | 9.6     | 21.4  | 2.22  |
| hsa-miR-194-3p   | 10.3    | 22.8  | 2.21  |
| hsa-miR-3663-5p  | 27.9    | 61.5  | 2.20  |
| hsa-miR-29c-3p   | 75.0    | 163.0 | 2.17  |
| hsa-miR-4253     | 8.3     | 17.5  | 2.10  |

|                 |      |       |      |
|-----------------|------|-------|------|
| hsa-miR-222-3p  | 31.9 | 66.4  | 2.08 |
| hsa-miR-378b    | 9.1  | 18.6  | 2.05 |
| hsa-miR-5587-5p | 8.2  | 16.9  | 2.05 |
| hsa-miR-221-3p  | 91.1 | 186.0 | 2.04 |
| hsa-miR-4700-3p | 16.9 | 34.3  | 2.04 |
| hsa-miR-29a-5p  | 6.5  | 13.0  | 2.01 |
| hsa-miR-4716-3p | 8.1  | 16.2  | 2.01 |
| hsa-miR-5000-3p | 9.5  | 19.0  | 2.00 |
| hsa-miR-532-5p  | 13.3 | 26.6  | 2.00 |

**Supplementary Table 4: miRNAs downregulated by HBV infection in primary hepatocytes.** The miRNAs whose expression was downregulated more than 50% are indicated. The orange-colored numbers indicate those genes with significant levels of expression (more than 100 in signal intensities). mMRNA93-5p is indicated in pink.

| microRNA        | Control | HBV   | Ratio |
|-----------------|---------|-------|-------|
| hsa-miR-424-5p  | 37.3    | 9.6   | 0.26  |
| hsa-miR-5589-5p | 51.6    | 15.2  | 0.30  |
| hsa-miR-4470    | 23.8    | 7.5   | 0.31  |
| hsa-miR-3620-3p | 94.1    | 34.5  | 0.37  |
| hsa-miR-1233-3p | 50.4    | 20.2  | 0.40  |
| hsa-miR-323a-5p | 30.7    | 13.1  | 0.43  |
| hsa-miR-6073    | 18.2    | 8.0   | 0.44  |
| hsa-miR-365-3p  | 303.8   | 134.7 | 0.44  |
| hsa-miR-4755-3p | 67.5    | 30.4  | 0.45  |
| hsa-miR-93-5p   | 559.0   | 258.5 | 0.46  |
| hsa-miR-583     | 20.2    | 9.7   | 0.48  |
| hsa-miR-143-3p  | 294.6   | 143.3 | 0.49  |
| hsa-miR-3646    | 35.1    | 17.2  | 0.49  |
| hsa-miR-4723-3p | 15.3    | 7.6   | 0.50  |

**Supplementary Table 5: Genes upregulated by HBV infection and rescued by BNC-delivered miRNA93.** Those genes upregulated by HBV infection and subsequently downregulated by BNC-delivered miRNA93 in primary hepatocytes are indicated. The expression changes affected by BNCs containing miRNA93 alone are also provided. Colored numbers indicate those genes with significant levels of expression (more than 10 in signal intensities and higher expression in darker color).

| Gene Symbol | Gene description                                                      | Control | HBV  | Ratio | Control | miR93 | Ratio | Control | HBV+miR93 | Ratio |
|-------------|-----------------------------------------------------------------------|---------|------|-------|---------|-------|-------|---------|-----------|-------|
| HSD17B14    | 17-beta-hydroxysteroid dehydrogenase 14                               | 23      | 135  | 5.98  | 23      | 13    | 0.60  | 23      | 31        | 1.37  |
| TRIM31      | Tripartite motif-containing protein 31                                | 9       | 43   | 4.62  | 9       | 8     | 0.82  | 9       | 13        | 1.43  |
| MLC1        | Membrane protein MLC1                                                 | 4       | 16   | 4.34  | 4       | 3     | 0.93  | 4       | 4         | 1.04  |
| RILP        | Rab-interacting lysosomal protein                                     | 125     | 453  | 3.61  | 125     | 122   | 0.98  | 125     | 180       | 1.43  |
| CSN1S1      | Alpha-S1-casein Precursor                                             | 4       | 12   | 3.40  | 4       | 3     | 0.79  | 4       | 5         | 1.23  |
| MT1A        | Metallothionein-1A                                                    | 362     | 1142 | 3.16  | 362     | 354   | 0.98  | 362     | 481       | 1.33  |
| ZFP3        | Zinc finger protein 3 homolog                                         | 4       | 13   | 3.10  | 4       | 4     | 0.88  | 4       | 5         | 1.29  |
| ACOT2       | Acyl-coenzyme A thioesterase 2                                        | 142     | 438  | 3.09  | 142     | 125   | 0.88  | 142     | 248       | 1.75  |
| SAT2        | Diamine acetyltransferase 2                                           | 473     | 1430 | 3.02  | 473     | 380   | 0.80  | 473     | 825       | 1.74  |
| ARFGAP3     | ADP-ribosylation factor GTPase-activating protein 3                   | 164     | 479  | 2.92  | 164     | 137   | 0.84  | 164     | 284       | 1.73  |
| AC005486.2  | cDNA FLJ51355                                                         | 19      | 52   | 2.67  | 19      | 19    | 0.99  | 19      | 28        | 1.46  |
| SAT2        | Diamine acetyltransferase 2                                           | 468     | 1216 | 2.60  | 468     | 452   | 0.97  | 468     | 885       | 1.89  |
| AC074397.7  | POM121-like protein DKFZp564N2472                                     | 63      | 160  | 2.56  | 63      | 47    | 0.75  | 63      | 92        | 1.46  |
| LCE3B       | Late cornified envelope protein 3B                                    | 3       | 7    | 2.55  | 3       | 2     | 0.89  | 3       | 4         | 1.58  |
| ACADM       | Medium-chain specific acyl-CoA dehydrogenase, mitochondrial Precursor | 936     | 2268 | 2.42  | 936     | 841   | 0.90  | 936     | 1449      | 1.55  |
| SLC24A4     | Sodium/potassium/calcium exchanger 4 Precursor                        | 3       | 8    | 2.42  | 3       | 2     | 0.59  | 3       | 2         | 0.53  |
| CHRNA4      | Neuronal acetylcholine receptor                                       | 3       | 6    | 2.37  | 3       | 2     | 0.91  | 3       | 3         | 1.31  |

|            |                                                                |      |       |      |      |      |      |      |       |      |
|------------|----------------------------------------------------------------|------|-------|------|------|------|------|------|-------|------|
|            | subunit alpha-4 Precursor                                      |      |       |      |      |      |      |      |       |      |
| ADH1C      | Alcohol dehydrogenase 1A                                       | 8477 | 20034 | 2.36 | 8477 | 7608 | 0.90 | 8477 | 14295 | 1.69 |
| AP001462.1 | Putative uncharacterized protein                               | 8    | 17    | 2.25 | 8    | 7    | 0.94 | 8    | 8     | 1.02 |
| PPP4R4     | Serine/threonine-protein<br>phosphatase 4 regulatory subunit 4 | 11   | 25    | 2.24 | 11   | 10   | 0.94 | 11   | 14    | 1.26 |
| CPT2       | Carnitine O-palmitoyltransferase 2,<br>mitochondrial Precursor | 287  | 607   | 2.12 | 287  | 270  | 0.94 | 287  | 461   | 1.61 |
| PUS1       | tRNA pseudouridine synthase A                                  | 61   | 128   | 2.11 | 61   | 56   | 0.93 | 61   | 108   | 1.77 |
| MAZ        | Myc-associated zinc finger protein                             | 2    | 5     | 2.11 | 2    | 2    | 0.84 | 2    | 1     | 0.64 |
| MALL       | MAL-like protein                                               | 9    | 18    | 2.10 | 9    | 9    | 0.99 | 9    | 17    | 1.99 |
